# Supplementary material
Source: Frontiers journal article supplement (https://www.frontiersin.org/articles/300306)
Supplement: Table_3.PDF [file Table_3.PDF]

**Table S.3:** Infrequently reported signs by those using the paper-based system to report cases. In total these accounted for around 18% of all signs recorded (N = 291 out of 1679 signs), but none of them occurred in >1% of cases.

|                             |                                     |                                           |
|-----------------------------|-------------------------------------|-------------------------------------------|
| 7 days ago heavily kicked   | history of eating grain             | swelling of jaw                           |
| abdominal swelling          | inflammation of the body            | swelling of penis                         |
| abnormal milk               | inflammation of the legs            | swelling of prepuce                       |
| abscess on the neck         | injury of the head by a bull        | swelling on both sides, prescapular area  |
| aggressive behavior         | itching the skin                    | swelling on hind limb and rupture         |
| allergy                     | kicking the ground                  | swelling on lower part of the belly       |
| alopecia                    | lesion on the leg and hoof          | swelling on the abdomen                   |
| anthriftness                | lice and tick infestation           | swelling on abdomen and tip of udder      |
| behavioral change           | local wound on hind limb with pus   | swelling on the back area                 |
| bleeding nose               | louse on its body                   | swelling on back region with discharge    |
| bleeding on its tail        | mucoid faeces                       | swelling on gluteal muscle and licking    |
| bleeding on the neck        | nausea                              | swelling on the head & leg region         |
| bleeding while milking      | nodules                             | swelling on the hind leg                  |
| blood mixed milk            | obstruction of the rumen            | swelling on the hoof                      |
| bloody discharge from mouth | offensive discharge/ no pregnancy   | swelling on the leg with pus              |
| bottle under neck           | offensive discharge using speculum  | swelling with pus discharge               |
| bottled jaw                 | one eye protruded                   | swellings on all body parts of the animal |
| broken horn                 | pain to touch                       | swollen throat                            |
| coagulated milk             | presence of tick                    | tachycardia                               |
| abdominal breathing         | rapid breathing                     | teeth grinding                            |
| colic                       | restless                            | teat of cow is not letting down milk      |
| congested mucus membrane    | retained placenta                   | tick infestation                          |
| congestion                  | roaring sound                       | tick/flea infestation                     |
| decreased milk production   | ruminal stasis                      | trauma on the right hind leg              |
| deep and wide wound         | rupture and bleeding of the skin    | udder swelling ( hot and painful)         |
| difficulty defecating       | scratching on standing objects      | inability of pregnancy                    |
| difficulty of giving birth  | shivering                           | unable to drink water                     |
| difficulty of urination     | sign of giving birth                | unable to ingest feed when feeding        |
| dilation of the eye         | skin irritation                     | unable to release the faeces              |
| dirty body                  | skin lesion                         | unable to urinate                         |
| discharge from mouth        | slight swelling on the skin         | unable to walk                            |
| discharge, non-specific     | small wounds on digital extremities | uncoordinated movement                    |
| discoloration of the eye    | sneezing                            | unthriftiness                             |
| discomfort during urination | standing recumbence                 | white greyish pus from the swelling       |
| dropping head               | straining                           | whitish ear                               |
| discharge from the mouth    | stretching                          | wound around prescapular area of skin     |
| dry faeces                  | stretching neck                     | wound at the neck region                  |
| dry muzzle                  | swelling of the lower jaw           | wound infection                           |
| ectoparasite                | swelled glans penis                 | wound-like lesions around mouth area      |
| fear of light               | swelling around the masseter muscle | wound on the digital extremities          |
| fertility problem           | swelling around the ribs            | wound on the foot root                    |
| grunting                    | swelling around tracheal area       | wound on the forelimb                     |
| hairless dead calf          | swelling of belly                   | wound on the gluteal muscle               |
| haemorrhage                 | swelling of both ears               | wounds on different parts of the body     |
| haemorrhagic mucus membrane | swelling of dewlap                  | yellowish milk                            |
